# Supplementary material
Source: PubMed Central journal article supplement (PMC4291679)
Supplement: pnas.201415261SI.pdf [file pnas.201415261SI.pdf]

# Supporting Information

Klotzsch et al. 10.1073/pnas.1415261112

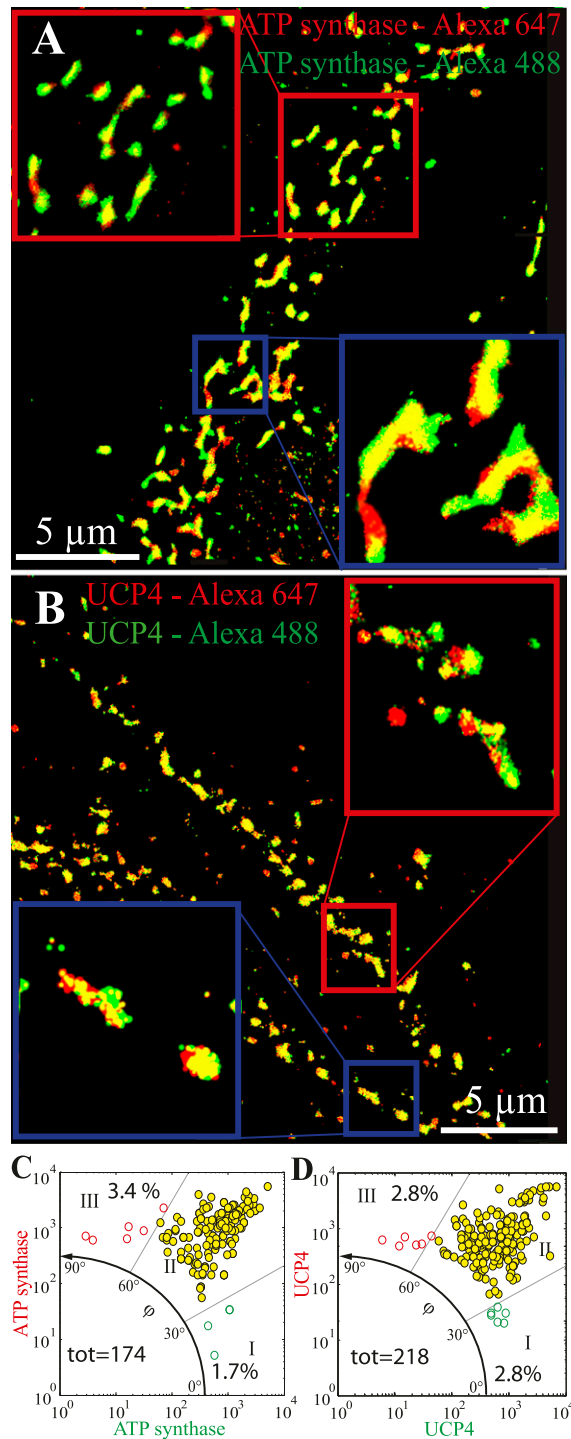

**Fig. S1.** Dual-color dSTORM (direct stochastic optical reconstruction microscopy) images of ATP synthase and UCP4 stained by two different fluorophores. (A) For ATP synthase labeled with Alexa 647 anti-mouse antibody (red) and Alexa 488 anti-mouse antibody (green) and (B) UCP4 labeled with Alexa 647 anti-rabbit antibody (red) and Alexa 488 anti-rabbit antibody (green), superresolution images acquired with dSTORM are shown. For at least three different views of A and B, scatter plots for the number of localizations for (C) ATP synthase (green)/ATP synthase (red) and (D) UCP4 (green)/UCP4 (red) in the individual mitochondria are shown. The plots are segmented in three different sectors (I–III) covering angles of 0° to 30°, 30° to 60°, and 60° to 90°, respectively. The color represents clusters of dominating Alexa 488 (green; sector I) and Alexa 647 (red; sector III) for A and B, respectively. Yellow dots indicate clusters with similar amounts of localizations within the clusters (sector II). Percentages refer to the fractions of detected localizations in the respective sectors, and tot specifies the total amount of mitochondria analyzed.
